# Supplementary material for: Rapid, Culture-Free Detection of Staphylococcus aureus Bacteremia
Source: PubMed Central journal article supplement (PMC4909304; doi:10.1371/journal.pone.0157234), 2016-06-15
Supplement: pone.0157234.s002.pdf [file pone.0157234.s002.pdf]

## S2 Table

| Sample ID | Pathogen                                                            | Time-to-positivity (Aerobic) | Time-to-positivity (Anaerobic) | Age of Sample (Days stored at 4°C) | Days Elapsed between blood culture and nuclease assay blood draws |
|-----------|---------------------------------------------------------------------|------------------------------|--------------------------------|------------------------------------|-------------------------------------------------------------------|
| 042115_1  | <i>Enterobacter cloacae</i> complex, <i>Streptococcus anginosus</i> | 43 hr, 50 min                | 3 hr, 56 min                   | 3                                  | 1                                                                 |
| 041515_1  | <i>Escherichia coli</i>                                             | 13 hr, 24 min                |                                | 2                                  | 1                                                                 |
| 042915_4  | <i>Escherichia coli</i>                                             | 58 hr, 18 min                | 58 hr, 18 min                  | 3                                  | 1                                                                 |
| 042215_4  | Positive Gram Stain, <i>Escherichia coli</i>                        |                              | 35 hr, 13 min                  | 1                                  | 1                                                                 |
| 040915_9  | <i>Klebsiella pneumoniae</i>                                        | 40 hr, 47 min                |                                | 4                                  | 1                                                                 |
| 042315_2  | <i>Streptococcus pneumoniae</i>                                     | 24 hr, 55 min                |                                | 2                                  | 1                                                                 |
| 042915_1  | <i>Burkholderia cepacia</i> complex                                 | 41 hr, 35 min                |                                | 5                                  | 0                                                                 |
| 040915_8  | <i>Enterococcus faecalis</i>                                        | 54 hr, 50 min                | 34 hr, 49 min                  | 3                                  | 0                                                                 |
| 040915_11 | <i>Enterococcus faecalis</i>                                        | 24 hr, 58 min                | 25 hr                          | 3                                  | 0                                                                 |
| 050515_2  | Positive Gram Stain, <i>Enterococcus faecalis</i>                   | 32 hr, 2 min                 |                                | 4                                  | 0                                                                 |
| 042215_3  | <i>Enterococcus faecium</i>                                         | 31 hr, 33 min                |                                | 4                                  | 0                                                                 |
| 050115_4  | <i>Enterococcus faecium</i>                                         | 50 hr, 31 min                | 40 hr, 31 min                  | 2                                  | 0                                                                 |
| 042915_3  | Vancomycin Resistant <i>Enterococcus faecium</i>                    |                              | 51 hr, 45 min                  | 3                                  | 0                                                                 |
| 050115_1  | <i>Escherichia coli</i>                                             | 15 hr, 48 min                |                                | 4                                  | 0                                                                 |
| 050115_2  | <i>Escherichia coli</i>                                             | 6 hr, 13 min                 |                                | 4                                  | 0                                                                 |
| 050115_5  | <i>Escherichia coli</i>                                             | 10 hr, 23 min                |                                | 2                                  | 0                                                                 |
| 050515_5  | <i>Escherichia coli</i>                                             |                              | 16 hr, 16 min                  | 3                                  | 0                                                                 |
| 050715_1  | <i>Klebsiella pneumoniae</i>                                        | 24 hr, 35 min                |                                | 3                                  | 0                                                                 |
| 050715_3  | <i>Proteus mirabilis</i>                                            | 14 hr, 10 min                | 14 hr, 11 min                  | 2                                  | 0                                                                 |
| 041615_2  | <i>Pseudomonas aeruginosa</i>                                       | 46 hr, 31 min                |                                | 3                                  | 0                                                                 |
| 042115_2  | <i>Pseudomonas aeruginosa</i>                                       | 6 hr, 15 min                 |                                | 3                                  | 0                                                                 |
| 040915_10 | <i>Pseudomonas aeruginosa</i> , mucoid                              | 47 hr                        |                                | 5                                  | 0                                                                 |
| 040915_4  | <i>S. aureus</i>                                                    | 25 hr, 16 min                |                                | 3                                  | 0                                                                 |
| 042215_1  | <i>S. aureus</i>                                                    | 20 hr, 46 min                |                                | 4                                  | 0                                                                 |
| 042915_2  | <i>S. aureus</i>                                                    |                              | 41 hr, 48 min                  | 3                                  | 0                                                                 |
| 042915_7  | <i>S. aureus</i>                                                    |                              | 3 hr, 56 min                   | 2                                  | 0                                                                 |
| 050115_3  | <i>S. aureus</i>                                                    | 41 hr, 44 min                | 31 hr, 44 min                  | 3                                  | 0                                                                 |
| 050515_1  | <i>S. aureus</i>                                                    | 15 hr, 27 min                | 45 hr, 27 min                  | 5                                  | 0                                                                 |
| 050515_3  | <i>S. aureus</i>                                                    | 34 hr, 12 min                | 16 hr, 13 min                  | 3                                  | 0                                                                 |
| 050715_4  | <i>S. aureus</i>                                                    | 4 hr, 53 min                 |                                | 2                                  | 0                                                                 |

**S2 Table.** Blood culture results pertaining to plasma samples used in nuclease assay of **Figure 5**. “Time-to-positivity” indicates the time elapsed for the blood cultures to indicate bacterial growth. Note: both aerobic and anaerobic cultures were prepared. In cases where only one of these became positive, only the positive value is included. Plasma samples were stored at 4°C for the number of days indicated in the “Age of Sample” column prior to being used (without freezing) in the nuclease activity assay. Blood was drawn for blood cultures on the same day, or one day prior to the blood that was used for nuclease assays, as indicated in the far right column. Samples are listed (from top to bottom) in the same order as they appear in the figure (from left to right).
